# Supplementary material
Source: HighWire-hosted journal article supplement (https://ez-admanager.com/highwire/filestream/161067/field_highwire_adjunct_files/0/busis_797.pdf)
Supplement: busis_797.pdf [file busis_797.pdf]

## 2016年の米国の神経内科医における バーンアウト、仕事への満足度、幸福感

Burnout, career satisfaction, and well-being among US neurologists in 2016

Neil A. Busis, MD\*;  
Tait D. Shanafelt, MD;  
Christopher M. Keran, BA;  
Kerry H. Levin, MD;  
Heidi B. Schwarz, MD;  
Jennifer R. Molano, MD;  
Thomas R. Vidic, MD;  
Joseph S. Kass, MD, JD;  
Janis M. Miyasaki, MD;  
Jeff A. Sloan, PhD;  
Terrence L. Cascino, MD

Department of Neurology,  
University of Pittsburgh  
School of Medicine, PA

Correspondence to  
Dr. Busis:  
busisna@upmc.edu

**目的：**米国の神経内科医におけるバーンアウト、仕事への満足度、幸福感について、これらの頻度と寄与因子を検討する。

**方法：**研修を修了した米国神経学会 (American Academy of Neurology) 会員の神経内科医4,127名を対象に2016年1月19日～3月21日において、妥当性が確認されている方法によりバーンアウト、仕事への満足度、幸福感を調査した。

**結果：**回答率は40.5% (4,127名中1,671名)であった。調査参加者の平均年齢は51歳、男性が65.3%を占め、米国の全地域をほぼ均等に代表していた。回答者の約60%には、バーンアウトの症状が少なくとも1つ認められた。1週間あたりの勤務時間、1週間あたりの夜間オンコールの回数、1週間あたりの外来診療患者数、事務作業量が、バーンアウトの高リスクと関連した。有能な医療事務スタッフ、仕事上での自律性、有意義な仕事、年齢、てんかんをサブスペシャリティ領域とすることは、低リスクと関連した。学術機関 (academic practice ; AP) の神経内科医は、臨床 (clinical practice ; CP) の神経内科医に比べ、バーンアウトが少なく、仕事への満足度が高く、生活の質も高かった。バーンアウトの寄与因子の一部はAPの神経内科医とCPの神経内科医との間で共通していたが、診療環境に特有のリスクもみられた。仕事への満足度に独立して関連する因子は、有意義な仕事、仕事上の自律性、有能な医療事務スタッフ、年齢、睡眠医学の診療 (逆相関)、診療時間の割合 (逆相関) であった。バーンアウトは、仕事への低い満足度と強く関連した。

**結論：**バーンアウトは、神経内科医のあらゆる診療環境およびサブスペシャリティ領域でよくみられる。仕事への満足度を高める最も大きな因子は、神経内科医が自分の仕事に意義を見出すことである。今回の調査結果は、米国の神経内科医においてバーンアウトを減らし、仕事への満足度と幸福感を高めるための必要な取り組みを示すものと考えられる。

Neurology® 2017; 88: 797-808

表3 バーンアウトと仕事への満足度：学術機関 (AP) の神経内科医と臨床 (CP) の神経内科医との比較

|                                                          | All<br>(n = 1,671) | AP<br>(n = 529) | CP <sup>a</sup><br>(n = 959) | p Value<br>comparison<br>AP to CP <sup>b</sup> |
|----------------------------------------------------------|--------------------|-----------------|------------------------------|------------------------------------------------|
| <b>Burnout indices<sup>c</sup></b>                       |                    |                 |                              |                                                |
| <b>Emotional exhaustion<sup>d</sup></b>                  |                    |                 |                              |                                                |
| Median                                                   | 28.0               | 26.5            | 29.0                         | 0.008                                          |
| % Low score                                              | 27.3               | 30.2            | 24.2*                        | 0.023                                          |
| % Intermediate score                                     | 19.3               | 19.8            | 19.1                         |                                                |
| % High score                                             | 53.4               | 50.0            | 56.7*                        |                                                |
| Missing, n                                               | 80                 | 3               | 32                           |                                                |
| <b>Depersonalization<sup>d</sup></b>                     |                    |                 |                              |                                                |
| Median                                                   | 8.0                | 7.0             | 8.0                          | 0.014                                          |
| % Low score                                              | 36.6               | 39.1            | 34.2                         | 0.018                                          |
| % Intermediate score                                     | 22.0               | 24.1            | 21.4                         |                                                |
| % High score                                             | 41.4               | 36.8            | 44.4*                        |                                                |
| Missing, n                                               | 68                 | 2               | 18                           |                                                |
| <b>Personal accomplishment<sup>d</sup></b>               |                    |                 |                              |                                                |
| Median                                                   | 40.0               | 40.0            | 40.0                         | 0.764                                          |
| % High score                                             | 52.8               | 53.4            | 52.1                         | 0.895                                          |
| % Intermediate score                                     | 26.0               | 25.8            | 26.3                         |                                                |
| % Low score <sup>e</sup>                                 | 21.2               | 20.8            | 21.6                         |                                                |
| Missing, n                                               | 98                 | 10              | 36                           |                                                |
| % Burned out <sup>f</sup>                                | 60.1               | 55.7            | 63.3                         | 0.004                                          |
| Missing, n                                               | 55                 | 1               | 11                           |                                                |
| <b>Career satisfaction</b>                               |                    |                 |                              |                                                |
| Would become physician again (career choice), % yes      | 61.3               | 67.4            | 57.5                         | <0.001                                         |
| Missing, n                                               | 49                 | 1               | 10                           |                                                |
| Would become neurologist again (specialty choice), % yes | 67.2               | 74.5            | 63.2                         | <0.001                                         |
| Missing, n                                               | 40                 | 0               | 2                            |                                                |

  

|                                                                                                                     | All<br>(n = 1,671)<br>67.0 | AP<br>(n = 529)<br>67.9 | CP <sup>a</sup><br>(n = 959)<br>65.9 | p Value<br>comparison<br>AP to CP <sup>b</sup> |
|---------------------------------------------------------------------------------------------------------------------|----------------------------|-------------------------|--------------------------------------|------------------------------------------------|
| <b>Overall, I am satisfied with my job, % agree</b>                                                                 |                            |                         |                                      |                                                |
| Missing, n                                                                                                          | 51                         | 0                       | 7                                    |                                                |
| <b>Quality of life, fatigue, and work-life integration</b>                                                          |                            |                         |                                      |                                                |
| Overall quality of life, <sup>g</sup> mean (SD)                                                                     | 6.2 (2.2)                  | 6.3 (2.1)               | 6.1 (2.2)                            |                                                |
| Median                                                                                                              | 7.0                        | 7.0                     | 6.0                                  | 0.033                                          |
| Missing, n                                                                                                          | 5                          | 1                       | 2                                    |                                                |
| Level of fatigue, <sup>g</sup> mean (SD)                                                                            | 5.2 (2.4)                  | 5.2 (2.3)               | 5.2 (2.4)                            |                                                |
| Median                                                                                                              | 5.0                        | 5.0                     | 5.0                                  | 0.586                                          |
| Missing, n                                                                                                          | 9                          | 2                       | 3                                    |                                                |
| Work schedule leaves enough time for personal/family life, % agree                                                  | 32.3                       | 30.9                    | 32.1                                 | 0.626                                          |
| Missing, n                                                                                                          | 51                         | 1                       | 12                                   |                                                |
| <b>Autonomy and meaning in work</b>                                                                                 |                            |                         |                                      |                                                |
| I have significant autonomy in determining how I do my job, % agree                                                 | 59.9                       | 58.0                    | 60.6                                 | 0.326                                          |
| Missing, n                                                                                                          | 46                         | 1                       | 3                                    |                                                |
| The work I do is meaningful to me, % agree                                                                          | 87.6                       | 88.3                    | 87.1                                 | 0.517                                          |
| Missing, n                                                                                                          | 47                         | 0                       | 4                                    |                                                |
| <b>Clerical tasks and support staff</b>                                                                             |                            |                         |                                      |                                                |
| The amount of time I spend on clerical tasks directly <sup>h</sup> related to patient care is reasonable, % agree   | 23.0                       | 18.3                    | 24.8                                 | 0.004                                          |
| Missing, n                                                                                                          | 64                         | 4                       | 5                                    |                                                |
| The amount of time I spend on clerical tasks indirectly <sup>h</sup> related to patient care is reasonable, % agree | 15.9                       | 12.2                    | 17.2                                 | 0.010                                          |
| Missing, n                                                                                                          | 66                         | 4                       | 7                                    |                                                |
| How much effective support staff do you have to assist you in your work? % Too little                               | 56.3                       | 67.9                    | 49.1                                 | <0.001                                         |
| Missing, n                                                                                                          | 73                         | 0                       | 25                                   |                                                |

<sup>a</sup> 個人開業、神経内科医師団による診療、複数領域の専門医師団による診療、病院勤務を含む。  
<sup>b</sup> 比較の検定では、連続変数にはKruskal-Wallis検定、カテゴリ変数にはカイ二乗検定を用いた。  
<sup>c</sup> Maslach Burnout Inventoryの全項目を用いて評価した。  
<sup>d</sup> 医療従事者に対するMaslach Burnout Inventoryの標準的な判定法に従い、情緒的疲弊感の下位尺度のスコアが27以上、非人間化の下位尺度のスコアが10以上、または個人的達成感の下位尺度のスコアが33以下の医師を、該当領域の高度のバーンアウトがあるとみなす。  
<sup>e</sup> 個人的達成感の下位尺度のスコアは低いほど、好ましくない状態である。  
<sup>f</sup> Maslach Burnout Inventoryの情緒的疲弊感または非人間化の下位尺度のスコアが高い場合とした（「方法」参照）。  
<sup>g</sup> 評価尺度は、0が最悪の状態、10が最良の状態である。  
<sup>h</sup> 患者のケアに直接関連する事務作業の例：オーダー登録、カルテの口述、検査結果の確認、患者ポータルシステムを通じた患者との会話。  
<sup>i</sup> 患者のケアに間接的に関係する事務作業の例：文書での対応、書類の記入の完成、電話対応。

表4 多変量解析によるバーンアウトの関連因子

| Group                                          | Predictor                                                                              | OR    | 95% CI |       | p Value |
|------------------------------------------------|----------------------------------------------------------------------------------------|-------|--------|-------|---------|
|                                                |                                                                                        |       | Lower  | Upper |         |
| All neurologists <sup>a-d</sup>                | Autonomy in job (Q9a)<br>(0 = disagree/neutral, 1 = agree)                             | 0.325 | 0.237  | 0.446 | <0.001  |
|                                                | Meaningful work (Q9b)<br>(0 = disagree/neutral, 1 = agree)                             | 0.334 | 0.188  | 0.593 | <0.001  |
|                                                | Reasonable amount of direct clerical tasks (Q10a)<br>(0 = disagree/neutral, 1 = agree) | 0.498 | 0.340  | 0.731 | <0.001  |
|                                                | Effective support staff (Q11)<br>(0 = too little, 1 = about right)                     | 0.593 | 0.440  | 0.801 | 0.001   |
|                                                | Hours worked per week (Q12)                                                            | 1.016 | 1.005  | 1.027 | 0.003   |
|                                                | Nights on call per week (Q14)                                                          | 1.092 | 1.019  | 1.171 | 0.013   |
|                                                | No. of outpatients (Q15)                                                               | 1.007 | 1.001  | 1.013 | 0.024   |
| Academic practice <sup>a,b,e,f</sup>           | Age (Q19)                                                                              | 0.973 | 0.960  | 0.985 | <0.001  |
|                                                | Epilepsy (Q24) (compared to general neurology)                                         | 0.536 | 0.303  | 0.947 | 0.032   |
|                                                | Autonomy in job (Q9a)<br>(0 = disagree/neutral, 1 = agree)                             | 0.332 | 0.193  | 0.573 | <0.001  |
|                                                | Hours worked per week (Q12)                                                            | 1.030 | 1.009  | 1.051 | 0.006   |
| Clinical practice <sup>a,b,g,h</sup>           | % Clinical time (Q13.1)                                                                | 1.016 | 1.000  | 1.032 | 0.043   |
|                                                | Autonomy in job (Q9a)<br>(0 = disagree/neutral, 1 = agree)                             | 0.299 | 0.195  | 0.457 | <0.001  |
|                                                | Meaningful work (Q9b)<br>(0 = disagree/neutral, 1 = agree)                             | 0.264 | 0.124  | 0.566 | 0.001   |
|                                                | Reasonable amount of direct clerical tasks (Q10a)<br>(0 = disagree/neutral, 1 = agree) | 0.469 | 0.289  | 0.761 | 0.002   |
|                                                | Effective support staff (Q11)<br>(0 = too little, 1 = about right)                     | 0.513 | 0.347  | 0.758 | 0.001   |
|                                                | No. of outpatients (Q15)                                                               | 1.011 | 1.003  | 1.018 | 0.004   |
|                                                | Age (Q19)                                                                              | 0.958 | 0.941  | 0.975 | <0.001  |
| Epilepsy (Q24) (compared to general neurology) | 0.408                                                                                  | 0.166 | 0.999  | 0.050 |         |

略語：CI=信頼区間、OR=オッズ比  
 バーンアウトと関連する個人的因子と職業上の因子を特定するため、多変量解析を3回行った。最初のモデルはすべての神経内科医を対象とした。また、職業上の特徴の差が大きいことを考慮し、学術機関 (AP) の神経内科医と臨床 (CP) の神経内科医について個別のモデルを作成した。  
<sup>a</sup> 全モデルに含まれる個人的特徴：年齢、性別、地域。  
<sup>b</sup> 全モデルに含まれる職業上の特徴：自律性、有意義な仕事、患者のケアに直接関連する事務作業、患者のケアに間接的に関係する事務作業、有能な医療事務スタッフ、1週間あたりの勤務時間、夜間オンコール回数、外来患者数、入院患者数、週末の病院回診数、サブスペシャリティ領域。  
<sup>c</sup> すべての神経内科医を対象とするモデルで追加された職業上の特徴：診療時間の割合 (%)、職場環境 [学術機関 (AP) の神経内科医または臨床 (CP) の神経内科医]、雇用形態、報酬の方法。  
<sup>d</sup> 結果は、3通りの変数入力方法 (すべての変数を同時に投入する方法、ステップワイズ法の変数増加法、ステップワイズ法の変数減少法) すべてで有意であった変数を示す。以下の変数は1つか2つの入力方法のみで有意であった [診療時間の割合 (%)、地域、サブスペシャリティ領域が行動神経学であること]。  
<sup>e</sup> 学術機関 (AP) の神経内科医を対象とするモデルで追加された職業上の特徴：各業務時間 (臨床、研究、教育、管理、その他) の割合 (%)、報酬の方法 (給料または給料+ボーナス)。  
<sup>f</sup> 結果は、3通りの変数入力方法 (すべての変数を同時に投入する方法、ステップワイズ法の変数増加法、ステップワイズ法の変数減少法) すべてで有意であった変数を示す。以下の変数は1つか2つの入力方法のみで有意であった [患者のケアに直接関連する事務作業、患者のケアに間接的に関係する事務作業、夜間オンコール回数、地域、サブスペシャリティ領域が小児神経学・てんかん・睡眠医学であること]。  
<sup>g</sup> 臨床 (CP) の神経内科医を対象とするモデルで追加された職業上の特徴：診療時間の割合 (%)、診療環境 (個人開業、神経内科医師団による診療、複数領域の専門医師団による診療、病院勤務)、雇用形態、報酬の方法。  
<sup>h</sup> 結果は、3通りの変数入力方法 (すべての変数を同時に投入する方法、ステップワイズ法の変数増加法、ステップワイズ法の変数減少法) すべてで有意であった変数を示す。以下の変数は2つの入力方法のみで有意であった [夜間オンコール回数]。
